# Supplementary material for: Potential atypical antipsychotics: synthesis, binding affinity and SAR of new heterocyclic bioisosteric butyrophenone analogues as multitarget ligands
Source: Royal Society of Chemistry journal article supplement (doi:10.1039/c1md00202c), 2011-01-01
Supplement: c1md00202c.pdf [file c1md00202c.pdf]

## Supporting information

### Potential atypical antipsychotics: Synthesis, binding affinity and SAR of new heterocyclic bioisosteric butyrophenone analogues as multitarget ligands

María Barceló,<sup>a</sup> Enrique Raviña,<sup>a</sup> M. J. Varela,<sup>b</sup> José Brea,<sup>b</sup> María I. Loza<sup>b</sup> and Christian F. Masaguer<sup>\*a</sup>

<sup>a</sup>*Departamento de Química Orgánica, Laboratorio de Química Farmacéutica, Facultad de Farmacia, Universidad de Santiago de Compostela. E-15782, Santiago de Compostela, Spain. E-mail: christianf.masaguer@usc.es; Fax: +34-881-594628; Tel: +34-881-815099.*

<sup>b</sup>*Departamento de Farmacología, Facultad de Farmacia, Universidad de Santiago de Compostela. E-15782, Santiago de Compostela, Spain*

E-mail: [christianf.masaguer@usc.es](mailto:christianf.masaguer@usc.es)

## Table of Contents

|                                         |            |
|-----------------------------------------|------------|
| <b>1. Chemistry general.....</b>        | <b>S2</b>  |
| <b>2. Procedures.....</b>               | <b>S2</b>  |
| <b>3. Receptor binding studies.....</b> | <b>S15</b> |
| <b>4. References.....</b>               | <b>S16</b> |

## 1. Chemistry general

All chemicals were purchased from commercial sources (e.g., Aldrich Chemical Co.) where available and used without further purification. When necessary, solvents were purified by distillation over an appropriate drying agent under an argon atmosphere and used immediately. Diazomethane solution was prepared according to Vogel.<sup>43</sup> Melting points were determined with a Kofler hot stage instrument or a Gallenkamp capillary melting point apparatus and are uncorrected. Infrared spectra were recorded with a Perkin Elmer 1600 FTIR spectrophotometer; the main bands are given, in  $\text{cm}^{-1}$ . NMR spectra were recorded on a Bruker WM AMX (300 MHz for  $^1\text{H}$  NMR, and 75.5 MHz for  $^{13}\text{C}$  NMR); chemical shifts ( $\delta$ ) were recorded in ppm downfield from tetramethylsilane (TMS) as internal reference; approximate coupling constants ( $J$ ) are given in Hertz (Hz). All of the observed signals were consistent with the proposed structures; the following abbreviations were used for signal assignment: Bzi, benzoisoxazole; Bzt, benzothiazole; Bz, benzoyl; Idz, indazole; Ind, indole; Ph, phenyl; Pip, piperidine; Pyr, pyrrolidine; Thp, tetrahydropyridine; Ts, tosyl. Mass spectra were performed on a Kratos MS-50 or a Varian Mat-711 mass spectrometers by chemical ionization (CI) or by electron impact (EI) methods. Flash column chromatography was performed using Kieselgel 60 (60-200 mesh, E. Merck AG, Darmstadt, Germany). Reactions were monitored by thin layer chromatography (TLC) on Merck 60 GF254 chromatogram sheets using iodine vapour and/or UV light for detection. Unless otherwise stated, each purified compounds showed a single spot. Elemental combustion analyses were performed using a Perkin Elmer 240B apparatus. Unless otherwise stated, all reported values were within  $\pm 0.4\%$  of the theoretical compositions.

## 2. Procedures

### 2-[(Dimethylamino)methylen]-5-(methoxymethyl)-1,3-cyclohexanedione (2).

To a solution of diketone **1** (1.0 g, 6.4 mmol) in anhydrous THF (100 mL), cooled in an ice bath, was added DMFDMA (0.85 g, 7.1 mmol). The reaction mixture was stirred at room temperature for 1 h and refluxed for 12 h. After cooling, the solvent was evaporated under vacuum and the residue was purified by column chromatography using AcOEt as the eluent to give the title compound (1.28 g, 95%) as a yellowish solid, mp 84–85 °C. IR: 2929, 1660, 1631, 1584, 1106.  $^1\text{H}$  NMR ( $\text{CDCl}_3$ ):  $\delta$  8.02 (s, 1H, =CH), 3.38 (s, 2H,  $\text{CH}_3\text{OCH}_2$ ), 3.34 (s, 6H,  $\text{N}(\text{CH}_3)_2$ ), 3.17 (s, 3H,  $\text{OCH}_3$ ), 2.58–2.54 (m, 2H,  $1\text{H}_4 + 1\text{H}_6$ ), 2.39–2.26 (m, 3H,  $1\text{H}_4 + \text{H}_5 + 1\text{H}_6$ ).  $^{13}\text{C}$  NMR ( $\text{CDCl}_3$ ):  $\delta$  195.0 (2CO), 162.5 (=CH– $\text{N}(\text{CH}_3)_2$ ), 109.5 ( $\text{C}_2$ ), 76.4 ( $\text{CH}_3\text{OCH}_2$ ), 59.5 ( $\text{OCH}_3$ ), 48.5 and 45.0 ( $\text{N}(\text{CH}_3)_2$ ), 41.7 ( $\text{C}_4 + \text{C}_6$ ), 32.6 ( $\text{C}_5$ ). MS (CI)  $m/z$ : 211 [ $\text{M} + \text{H}$ ]<sup>+</sup>.

**6,7-Dihydro-6-(methoxymethyl)indazol-4(5H)-one (3).**

To a suspension of hydrazine hydrochloride (0.27 g, 2.56 mmol) in methanol (5 mL), a 2N aqueous solution of NaOH (3.84 mL, 7.68 mmol) was added. To this mixture enaminone **2** (0.54 g, 2.56 mmol) was added dropwise and the mixture was stirred at 80 °C for 4 h. Once cooled, the reaction mixture was neutralized with 10% HCl (2 mL) and concentrated to dryness. The residue was extracted at 50 °C with AcOEt, filtered and the filtrate was evaporated under reduced pressure. Purification of the residue by column chromatography using AcOEt as the eluent gave the title compound (0.32 g, 70%) as a white solid, mp 98–100 °C. IR: 3200, 2926, 1662, 1510. <sup>1</sup>H NMR (CDCl<sub>3</sub>): δ 8.00 (s, 1H, H<sub>3</sub>), 3.46–3.39 (m, 2H, CH<sub>3</sub>OCH<sub>2</sub>), 3.36 (s, 3H, OCH<sub>3</sub>), 3.07 (dd, 1H, *J* = 16.2, 4.3 Hz, H<sub>5</sub>), 2.75 (dd, 1H, *J* = 16.1, 9.6 Hz, H<sub>5</sub>), 2.62–2.53 (m, 2H, H<sub>6</sub> + H<sub>7</sub>), 2.40 (dd, 1H, *J* = 17.1, 11.8 Hz, H<sub>7</sub>). <sup>13</sup>C NMR (CDCl<sub>3</sub>): δ 193.6 (C<sub>4</sub>), 152.7 (C<sub>7a</sub>), 134.6 (C<sub>3</sub>), 119.0 (C<sub>3a</sub>), 75.9 (CH<sub>3</sub>OCH<sub>2</sub>), 59.1 (OCH<sub>3</sub>), 42.0 (C<sub>5</sub>), 37.1 (C<sub>6</sub>), 25.4 (C<sub>7</sub>). MS (EI) *m/z*: 180 [M]<sup>+</sup>. Anal. (C<sub>9</sub>H<sub>12</sub>N<sub>2</sub>O<sub>2</sub>): C, H, N.

**6,7-Dihydro-6-(methoxymethyl)-1-methyl-1H-indazol-4(5H)-one (4).**

To a stirred solution of enaminone **2** (0.54 g, 2.56 mmol) in methanol (5 mL), cooled in an ice bath, was added dropwise a solution of methylhydrazine (0.14 mL; 2.56 mmol) in methanol (3 mL). The reaction mixture was stirred at reflux temperature for 3 hours and then concentrated *in vacuo*, giving a residue which was purified by column chromatography eluting with AcOEt to give the title compound (0.35 g, 70%) as a white solid, mp 92–93 °C (2-propanol). IR: 2923, 1663, 1518, 1451, 1116. <sup>1</sup>H NMR (CDCl<sub>3</sub>): δ 7.85 (s, 1H, H<sub>3</sub>), 3.81 (s, 3H, NCH<sub>3</sub>), 3.48–3.36 (m, 2H, CH<sub>3</sub>OCH<sub>2</sub>), 3.37 (s, 3H, OCH<sub>3</sub>), 2.98 (dd, 1H, *J* = 15.1, 3.6 Hz, 1H<sub>5</sub>), 2.70–2.56 (m, 2H, 1H<sub>5</sub>, H<sub>6</sub>), 2.51 (dd, 1H, *J* = 16.9, 3.1 Hz, 1H<sub>7</sub>), 2.34 (dd, 1H, *J* = 16.5, 11.3 Hz, 1H<sub>7</sub>). <sup>13</sup>C NMR (CDCl<sub>3</sub>): δ 192.2 (C<sub>4</sub>), 149.0 (C<sub>7a</sub>), 137.4 (C<sub>3</sub>), 119.5 (C<sub>3a</sub>), 75.8 (CH<sub>3</sub>OCH<sub>2</sub>), 59.4 (OCH<sub>3</sub>), 41.3 (C<sub>5</sub>), 36.9 (CH<sub>3</sub>), 36.5 (C<sub>6</sub>), 24.8 (C<sub>7</sub>). MS (CI) *m/z*: 389 [M + H]<sup>+</sup>. Anal. (C<sub>10</sub>H<sub>14</sub>N<sub>2</sub>O<sub>2</sub>·0.1H<sub>2</sub>O): C, H, N.

**2-Acetyl-3-hydroxy-5-(methoxymethyl)-2-cyclohexenone (13).**

To a solution of **1** (0.56 g, 3.57 mmol) in anhydrous CHCl<sub>3</sub> (10 mL), Et<sub>3</sub>N (0.36 g, 3.57 mmol), Ac<sub>2</sub>O (0.36 g, 3.50 mmol) and DMAP (catalytic) were added, and the mixture stirred at rt for 24 h. After evaporating the solvent under reduced pressure, the residue was purified by column chromatography with 1:3 AcOEt/hexane as the eluent to afford the title compound (0.52 g, 74%) as a colourless oil. IR: 2927, 1667, 1558, 1446. <sup>1</sup>H NMR (CDCl<sub>3</sub>): δ 18.07 (s, 1H, OH), 3.36–3.26 (m, 2H, CH<sub>3</sub>OCH<sub>2</sub>), 3.32 (s, 3H, OCH<sub>3</sub>), 2.74 (d, 1H, *J* = 4.3 Hz, 1H<sub>6</sub>), 2.69–2.47 (m, 2H, 1H<sub>6</sub> + H<sub>5</sub>), 2.57 (s, 3H, COCH<sub>3</sub>), 2.37–2.30 (m, 2H, 2H<sub>4</sub>). <sup>13</sup>C NMR (CDCl<sub>3</sub>): δ 203.1 (COCH<sub>3</sub>), 198.4 (C<sub>3</sub>),

195.1 (CO), 113.4 (C<sub>2</sub>), 75.5 (CH<sub>3</sub>OCH<sub>2</sub>), 59.4 (OCH<sub>3</sub>), 41.9 (C<sub>6</sub>), 36.5 (C<sub>4</sub>), 32.1 (C<sub>5</sub>), 29.0 (CH<sub>3</sub>CO). MS (EI) *m/z*: 198 [M]<sup>+</sup>.

#### **6,7-Dihydro-3-methyl-6-(methoxymethyl)benzo[d]isoxazol-4(5H)-one (14).**

A solution of hydroxylamine was prepared by combining warm (60 °C) methanol solutions of hydroxylamine hydrochloride (0.17 g, 2.87 mmol, in 1 mL) and potassium hydroxide (0.16 g, 2.47 mmol, in 0.70 mL). After cooling to rt the solid precipitated (KCl) was filtered off, and the filtrate was added dropwise to a solution of **13** (0.33 g, 1.65 mmol) in anhydrous benzene (3.3 mL) at 0 °C. The mixture was stirred for 48 h at rt, then water (5 mL) was added and the mixture was extracted with ether (2 × 10 mL). The organic phase was washed with 10% Na<sub>2</sub>CO<sub>3</sub> solution (2 × 10 mL), water (10 mL) and brine (12 mL), then dried (Na<sub>2</sub>SO<sub>4</sub>) and concentrated under reduced pressure to give the title compound as colourless oil. A second portion of this compound could be obtained from the aqueous phase by acidifying to pH 3 with 10% HCl and further extraction with Et<sub>2</sub>O. Total yield: 0.23 g, 71%. IR: 2928, 1687, 1604, 1463, 1119. <sup>1</sup>H NMR (CDCl<sub>3</sub>): δ 3.46–3.38 (m, 2H, CH<sub>3</sub>OCH<sub>2</sub>), 3.35 (s, 3H, OCH<sub>3</sub>), 3.09 (dd, 1H, *J* = 17.6, 5.4 Hz, 1H<sub>7</sub>), 2.84 (dd, 1H, *J* = 17.6, 9.6 Hz, 1H<sub>7</sub>), 2.64–2.58 (m, 1H, H<sub>6</sub>), 2.57–2.46 (m, 1H, 1H<sub>5</sub>), 2.45 (s, 3H, CH<sub>3</sub>), 2.42–2.36 (m, 1H, 1H<sub>5</sub>). <sup>13</sup>C NMR (CDCl<sub>3</sub>): δ 192.7 (C<sub>4</sub>), 180.9 (C<sub>7a</sub>), 157.7 (C<sub>3</sub>), 115.4 (C<sub>3a</sub>), 75.3 (CH<sub>3</sub>OCH<sub>2</sub>), 59.5 (OCH<sub>3</sub>), 41.7 (C<sub>5</sub>), 36.3 (C<sub>6</sub>), 26.5 (C<sub>7</sub>), 11.1 (CH<sub>3</sub>). MS (CI) *m/z*: 195 [M + H]<sup>+</sup>.

#### **2-Diazo-5-(methoxymethyl)-1,3-cyclohexanedione (18).**

A solution of *p*-tosyl azide (0.37 g, 1.90 mmol) and triethylamine (0.26 mL, 1.90 mmol) in CH<sub>2</sub>Cl<sub>2</sub> (1.10 mL) was added to a solution of diketone **1** (0.22 g, 1.43 mmol) in CH<sub>2</sub>Cl<sub>2</sub> (6.60 mL). The mixture was protected from light and stirred at rt for 15 h. Then, the mixture was washed with 5% NaOH solution (2 × 2 mL) and water (2 × 4 mL), the organic phase was dried (Na<sub>2</sub>SO<sub>4</sub>) and concentrated to dryness. The residue was purified by column chromatography with 2:3 Et<sub>2</sub>O/hexane as the eluent to afford the title compound (0.21 g, 80%) as a colourless oil. IR: 2894, 2142, 1647, 1296, 1125. <sup>1</sup>H NMR (CDCl<sub>3</sub>): δ 3.33–3.31 (m, 2H, CH<sub>3</sub>OCH<sub>2</sub>), 3.29 (s, 3H, OCH<sub>3</sub>), 2.69 (dd, 2H, *J* = 13.0, 1.6 Hz, 1H<sub>4</sub> + 1H<sub>6</sub>), 2.55–2.37 (m, 3H, 1H<sub>5</sub> + 1H<sub>4</sub> + 1H<sub>6</sub>). <sup>13</sup>C NMR (CDCl<sub>3</sub>): δ 190.1 (2CO), 75.3 (CH<sub>3</sub>OCH<sub>2</sub>), 59.4 (OCH<sub>3</sub>), 40.4 (C<sub>4</sub> + C<sub>6</sub>), 32.0 (C<sub>5</sub>). MS (CI) *m/z*: 183 [M + H]<sup>+</sup>.

#### **6,7-Dihydro-2-methyl -6-(methoxymethyl)benzoxazol-4(5H)-one (19).**

A solution of **18** (210 mg, 1.16 mmol) and Rh<sub>2</sub>(OAc)<sub>4</sub> (10 mg, 0.02 mmol) in anhydrous acetonitrile (3.40 mL, 65 mmol) was stirred at 60 °C for 7 h. After cooling, the solvent was removed *in vacuo* and the residue was purified by column chromatography with 1:2 AcOEt/hexane as the eluent to

afford the title compound (136 mg, 60%) as a white solid, mp 34–36 °C. FTIR (KBr): 2930, 1691, 1613, 1397, 1201, 1115, 1053. <sup>1</sup>H-NMR (CDCl<sub>3</sub>): δ 3.48–3.38 (m, 2H, CH<sub>3</sub>OCH<sub>2</sub>), 3.36 (s, 3H, OCH<sub>3</sub>), 3.02 (dd, 1H, *J* = 17.4, 5.4 Hz, 1H<sub>7</sub>), 2.86–2.78 (m, 1H, 1H<sub>7</sub>), 2.65–2.49 (m, 2H, H<sub>6</sub>, 1H<sub>5</sub>), 2.48 (s, 3H, CH<sub>3</sub>), 2.45–2.39 (m, 1H, 1H<sub>5</sub>). <sup>13</sup>C NMR (CDCl<sub>3</sub>): δ 190.7 (C<sub>4</sub>), 163.9 (C<sub>2</sub>), 162.3 (C<sub>7a</sub>), 134.4 (C<sub>3a</sub>), 75.4 (CH<sub>3</sub>OCH<sub>2</sub>), 59.4 (OCH<sub>3</sub>), 41.2 (C<sub>5</sub>), 36.1 (C<sub>6</sub>), 25.6 (C<sub>7</sub>), 14.2 (CH<sub>3</sub>). MS (EI) *m/z*: 195 [M + H]<sup>+</sup>.

### 2-Amino-5,6-dihydro-5-(methoxymethyl)benzothiazol-7(4*H*)-one (23).

A mixture of diketone **1** (220 mg, 1.43 mmol), thiourea (110 mg; 1.39 mmol), NBS (210 mg; 1.19 mmol) and benzoyl peroxide (catalytic) in anhydrous benzene (8 mL) was refluxed for 48 h. After cooling, the solvent was evaporated under vacuum, and the resultant residue was dissolved in water and basified with K<sub>2</sub>CO<sub>3</sub> solution until pH 12. The aqueous solution was extracted with CH<sub>2</sub>Cl<sub>2</sub>, the organic phase was dried (Na<sub>2</sub>SO<sub>4</sub>), filtered and concentrated under reduced pressure to give a yellow solid which was purified by column chromatography with 30:1 CH<sub>2</sub>Cl<sub>2</sub>/MeOH as the eluent to afford the title compound (180 mg, 70%) as a yellowish solid, mp 165–167 °C (benzene). IR: 3096, 1614, 1511, 1395, 1334. <sup>1</sup>H NMR (CD<sub>3</sub>OD): δ 3.43 (d, 2H, *J* = 5.2 Hz, CH<sub>3</sub>OCH<sub>2</sub>), 3.37 (s, 3H, CH<sub>3</sub>), 2.87 (d, 1H, *J* = 2.7 Hz, 1H<sub>4</sub>), 2.64–2.44 (m, 3H, 1H<sub>4</sub>, H<sub>5</sub>, 1H<sub>6</sub>), 2.40–2.34 (m, 1H, 1H<sub>6</sub>). <sup>13</sup>C NMR (CD<sub>3</sub>OD): δ 191.4 (C<sub>7</sub>), 177.4 (C<sub>2</sub>), 168.5 (C<sub>3a</sub>), 118.8 (C<sub>7a</sub>), 75.6 (CH<sub>3</sub>OCH<sub>2</sub>), 58.1 (OCH<sub>3</sub>), 39.9 (C<sub>6</sub>), 36.1 (C<sub>4</sub>), 30.0 (C<sub>5</sub>). MS (EI) *m/z*: 212 [M]<sup>+</sup>. Anal. (C<sub>9</sub>H<sub>12</sub>N<sub>2</sub>O<sub>2</sub>S·0.05C<sub>6</sub>H<sub>6</sub>): C, H, N, S.

### 5,6-Dihydro-5-(methoxymethyl)-2-(pyrrolidin-1-yl)benzothiazol-7(4*H*)-one (24).

A solution of aminothiazole **23** (120 mg, 0.56 mmol) and 30% aqueous NaOH (0.15 mL; 1.1 mmol) in acetone (2 mL) was stirred at room temperature for 10 minutes. Then, 1,4-dibromobutane (70 μL, 0.56 mmol) was added and the mixture was refluxed for 7 h. After cooling to room temperature, the mixture was filtered and the filtrate was concentrated. The residue was taken into water (5 mL), extracted with CH<sub>2</sub>Cl<sub>2</sub> (3 × 4 mL), and the organic phase was dried (Na<sub>2</sub>SO<sub>4</sub>) and the solvent evaporated. Purification of the residue by column chromatography with CH<sub>2</sub>Cl<sub>2</sub> as the eluent afforded the title compound (107 mg, 70%) as a yellow solid, mp 97–99 °C (cyclohexane). IR: 2870, 1628, 1554, 1386, 1249, 1113. <sup>1</sup>H NMR (CDCl<sub>3</sub>): δ 3.43 (br s, 4H, 2H<sub>2</sub> + 2H<sub>5</sub> Pyr), 3.40 (d, 2H, *J* = 5.4 Hz, CH<sub>3</sub>OCH<sub>2</sub>), 3.35 (s, 3H, CH<sub>3</sub>), 2.98 (dd, 1H, *J* = 16.6, 3.7 Hz, 1H<sub>4</sub>), 2.69–2.53 (m, 3H, 1H<sub>4</sub>, 1H<sub>5</sub>, 1H<sub>6</sub>), 2.42–2.33 (m, 1H, 1H<sub>6</sub>), 2.10–2.05 (m, 4H, 2H<sub>3</sub> + 2H<sub>4</sub> Pyr). <sup>13</sup>C NMR (CDCl<sub>3</sub>): δ 198.6 (C<sub>7</sub>), 171.3 (C<sub>2</sub>), 167.6 (C<sub>3a</sub>), 119.4 (C<sub>7a</sub>), 75.8 (CH<sub>3</sub>OCH<sub>2</sub>), 58.9 (OCH<sub>3</sub>), 49.9 (C<sub>6</sub>), 40.2 (C<sub>2</sub> + C<sub>5</sub> Pyr), 35.9 (C<sub>5</sub>), 30.7 (C<sub>4</sub>), 25.6 (C<sub>3</sub> + C<sub>4</sub> Pyr). MS (EI) *m/z*: 266 [M]<sup>+</sup>. Anal. (C<sub>13</sub>H<sub>18</sub>N<sub>2</sub>O<sub>2</sub>S): C, H, N, S.

### General procedure for the methyl ether hydrolysis of compounds 3, 4, 14, 19, and 24

To a solution of the methyl ether (1.54 mmol) in anhydrous  $\text{CH}_2\text{Cl}_2$  (6 mL) cooled at  $-40\text{ }^\circ\text{C}$ , a 1M solution of  $\text{BBr}_3$  in  $\text{CH}_2\text{Cl}_2$  (1.85 mL, 1.85 mmol) was added. The mixture was stirred at  $-40\text{ }^\circ\text{C}$  for 12 h and then at  $0\text{ }^\circ\text{C}$  for 12 h. After reaching room temperature, the mixture was basified until pH 8 by adding a saturated solution of  $\text{NaHCO}_3$  and extracted with  $\text{CH}_2\text{Cl}_2$  ( $3 \times 3\text{ mL}$ ) and AcOEt ( $6 \times 3\text{ mL}$ ). The organic extracts were dried ( $\text{Na}_2\text{SO}_4$ ), concentrated under reduced pressure, and the crude product was purified by column chromatography.

#### 6,7-Dihydro-6-(hydroxymethyl)-1*H*-indazol-4(5*H*)-one (5).

Eluent: 1:2 toluene/acetone. White solid, mp  $159\text{--}160\text{ }^\circ\text{C}$  (2-propanol). Yield: 81%. IR: 3264, 1685, 1042.  $^1\text{H}$  NMR ( $\text{D}_2\text{O}$ ):  $\delta$  7.79 (s, 1H,  $\text{H}_3$ ), 3.56–3.40 (m, 2H,  $\text{CH}_2\text{OH}$ ), 2.85 (dd, 1H,  $J = 16.5, 3.8\text{ Hz}$ ,  $\text{H}_5$ ), 2.46 (dd, 1H,  $J = 16.5, 10.4\text{ Hz}$ ,  $\text{H}_5$ ), 2.50–2.17 (m, 3H,  $\text{H}_6, 2\text{H}_7$ ).  $^{13}\text{C}$  NMR ( $\text{D}_2\text{O}$ ):  $\delta$  198.3 ( $\text{C}_4$ ), 154.5 ( $\text{C}_{7a}$ ), 134.8 ( $\text{C}_3$ ), 117.6 ( $\text{C}_{3a}$ ), 64.8 ( $\text{CH}_2\text{OH}$ ), 40.7 ( $\text{C}_5$ ), 38.5 ( $\text{C}_6$ ), 24.0 ( $\text{C}_7$ ). MS (EI)  $m/z$ : 166 [ $\text{M}$ ] $^+$ . Anal. ( $\text{C}_8\text{H}_{10}\text{N}_2\text{O}_2 \cdot 0.1\text{C}_4\text{H}_8\text{O}_2 \cdot 0.33\text{H}_2\text{O}$ ): C, H, N.

#### 6,7-Dihydro-6-(hydroxymethyl)-1-methyl-1*H*-indazol-4(5*H*)-one (6).

Eluent: 1:2 toluene/acetone. Beige solid, mp  $109\text{--}110\text{ }^\circ\text{C}$  (2-propanol). Yield: 40%. IR: 3406, 1656, 1514.  $^1\text{H}$  NMR ( $\text{CDCl}_3$ ):  $\delta$  7.86 (s, 1H,  $\text{H}_3$ ), 3.83 (s, 3H,  $\text{CH}_3$ ), 3.79 (dd, 1H,  $J = 10.6, 4.7\text{ Hz}$ ,  $\text{HCHOH}$ ), 3.67 (dd, 1H,  $J = 10.6, 6.6\text{ Hz}$ ,  $\text{HCHOH}$ ), 3.01 (dd, 1H,  $J = 16.3, 4.7\text{ Hz}$ ,  $\text{H}_5$ ), 2.70 (dd, 1H,  $J = 16.3, 9.5\text{ Hz}$ ,  $\text{H}_5$ ), 2.57–2.50 (m, 2H,  $\text{H}_6, 1\text{H}_7$ ), 2.36 (dd, 1H,  $J = 16.9, 12.0\text{ Hz}$ ,  $\text{H}_7$ ).  $^{13}\text{C}$  NMR ( $\text{CDCl}_3$ ):  $\delta$  192.6 ( $\text{C}_4$ ), 149.2 ( $\text{C}_{7a}$ ), 137.4 ( $\text{C}_3$ ), 119.5 ( $\text{C}_{3a}$ ), 65.8 ( $\text{CH}_2\text{OH}$ ), 41.1 ( $\text{C}_5$ ), 38.9 ( $\text{CH}_3$ ), 36.5 ( $\text{C}_6$ ), 24.4 ( $\text{C}_7$ ). MS (CI)  $m/z$ : 181 [ $\text{M} + \text{H}$ ] $^+$ . Anal. ( $\text{C}_9\text{H}_{12}\text{N}_2\text{O}_2 \cdot 0.25\text{C}_3\text{H}_8\text{O} \cdot 0.1\text{H}_2\text{O}$ ): C, H, N.

#### 6,7-Dihydro-6-(hydroxymethyl)-3-methylbenzo[*d*]isoxazol-4(5*H*)-one (15).

Eluent: 1:2 AcOEt/hexane. White solid, mp  $57\text{--}58\text{ }^\circ\text{C}$  (cyclohexane). Yield: 56%. IR: 3391, 1678, 1601, 1470.  $^1\text{H}$  NMR ( $\text{CDCl}_3$ ):  $\delta$  3.80–3.67 (m, 2H,  $\text{CH}_2\text{OH}$ ), 3.14 (dd, 1H,  $J = 17.6, 5.0\text{ Hz}$ ,  $\text{H}_7$ ), 2.88 (dd, 1H,  $J = 17.5, 9.3\text{ Hz}$ ,  $\text{H}_7$ ), 2.63–2.49 (m, 2H,  $\text{H}_6, 1\text{H}_5$ ), 2.47 (s, 3H,  $\text{CH}_3$ ), 2.45–2.39 (m, 1H,  $\text{H}_5$ ).  $^{13}\text{C}$  NMR ( $\text{CDCl}_3$ ):  $\delta$  192.9 ( $\text{C}_4$ ), 181.0 ( $\text{C}_{7a}$ ), 157.7 ( $\text{C}_3$ ), 115.4 ( $\text{C}_{3a}$ ), 65.4 ( $\text{CH}_2\text{OH}$ ), 41.4 ( $\text{C}_5$ ), 38.3 ( $\text{C}_6$ ), 26.2 ( $\text{C}_7$ ), 11.2 ( $\text{CH}_3$ ). MS (EI)  $m/z$ : 181 [ $\text{M}$ ] $^+$ . Anal. ( $\text{C}_9\text{H}_{11}\text{NO}_3 \cdot 0.05\text{H}_2\text{O}$ ): C, H, N.

#### 6,7-Dihydro-2-methyl -6-(hydroxymethyl)benzoxazol-4(5*H*)-one (20).

Eluent: AcOEt. White solid, mp  $93\text{--}94\text{ }^\circ\text{C}$  (2-propanol). Yield: 65%. IR: 1689, 1404, 1206, 1042.  $^1\text{H}$  NMR ( $\text{CDCl}_3$ ):  $\delta$  3.78–3.65 (m, 2H,  $\text{CH}_2\text{OH}$ ), 3.05 (dd, 1H,  $J = 17.5, 5.3\text{ Hz}$ ,  $\text{H}_7$ ), 2.90–2.81 (m, 1H,  $\text{H}_7$ ), 2.64–2.44 (m, 3H,  $\text{H}_6, \text{H}_5$ ), 2.47 (s, 3H,  $\text{CH}_3$ ).  $^{13}\text{C}$  NMR ( $\text{CDCl}_3$ ):  $\delta$  191.0 ( $\text{C}_4$ ), 164.1 ( $\text{C}_2$ ),

162.4 (C<sub>7a</sub>), 134.5 (C<sub>3a</sub>), 65.6 (CH<sub>2</sub>OH), 41.1 (C<sub>5</sub>), 38.3 (C<sub>6</sub>), 25.3 (C<sub>7</sub>), 14.3 (CH<sub>3</sub>). MS (EI) *m/z*: 181 [M]<sup>+</sup>. Anal. (C<sub>9</sub>H<sub>11</sub>NO<sub>3</sub>·0.1C<sub>3</sub>H<sub>8</sub>O): C, H, N.

**5,6-Dihydro-5-(hydroxymethyl)-2-(pyrrolidin-1-yl)benzothiazol-7(4*H*)-one (25).**

Eluent: 19:1 CH<sub>2</sub>Cl<sub>2</sub>/MeOH. Yellowish oil. Yield: 91%. IR: 2928, 1606, 1569, 1510, 1393. <sup>1</sup>H NMR (CDCl<sub>3</sub>): δ 3.68 (d, 2H, *J* = 5.1 Hz, CH<sub>2</sub>OH), 3.53 (br s, 4H, 2H<sub>2</sub> + 2H<sub>5</sub> Pyr), 3.00 (dd, 1H, *J* = 17.0, 3.9 Hz, 1H<sub>4</sub>), 2.71–2.34 (m, 4H, 1H<sub>4</sub>, H<sub>5</sub>, 2H<sub>6</sub>), 2.10–2.05 (m, 4H, 2H<sub>3</sub> + 2H<sub>4</sub> Pyr), 1.71 (br s, 1H, OH). <sup>13</sup>C NMR (CDCl<sub>3</sub>): δ 189.8 (C<sub>7</sub>), 171.4 (C<sub>2</sub>), 167.7 (C<sub>3a</sub>), 119.4 (C<sub>7a</sub>), 65.7 (CH<sub>2</sub>OH), 49.9 (C<sub>6</sub>), 39.9 (C<sub>2</sub> + C<sub>5</sub> Pyr), 38.2 (C<sub>5</sub>), 30.3 (C<sub>4</sub>), 25.5 (C<sub>3</sub> + C<sub>4</sub> Pyr). MS (EI) *m/z*: 252 [M]<sup>+</sup>.

**General procedure for the preparation of tosylates 9, 10, 16, 21, and 26.**

*p*-Toluenesulfonyl chloride (0.35 g, 1.83 mmol, 3 equiv) was added to a solution of the corresponding alcohol (0.61 mmol) in dry pyridine (5 mL) at 0 °C, and the mixture was stirred at room temperature for 12 hours. After addition of water (15 mL) and extraction with CH<sub>2</sub>Cl<sub>2</sub>, the organic layer was washed with water, dried (Na<sub>2</sub>SO<sub>4</sub>), concentrated to dryness, and the crude product was purified by column chromatography.

**6,7-Dihydro-1-(tosyl)-6-(tosyloxymethyl)-1*H*-indazol-4(5*H*)-one (9).**

The title compound was prepared using 7 equivalents of tosyl chloride. Eluent: 1:2 AcOEt/hexane. White solid, mp 140–142 °C. Yield: 50%. IR: 1694, 1562, 1375, 1184. <sup>1</sup>H NMR (CDCl<sub>3</sub>): δ 8.49 (s, 1H, H<sub>3</sub>), 7.91 (d, 2H, *J* = 8.4 Hz, H<sub>2</sub> + H<sub>6</sub> NTs), 7.78 (d, 2H, *J* = 8.3 Hz, H<sub>2</sub> + H<sub>6</sub> OTs), 7.40–7.34 (m, 4H, H<sub>3</sub> + H<sub>5</sub> OTs, H<sub>3</sub> + H<sub>5</sub> NTs), 4.13–3.96 (m, 2H, CH<sub>2</sub>OTs), 2.98 (d, 1H, *J* = 11.9 Hz, 1H<sub>5</sub>), 2.65–2.48 (m, 3H, 1H<sub>6</sub>, H<sub>6</sub>, 1H<sub>7</sub>), 2.46 (s, 3H, CH<sub>3</sub>), 2.45 (s, 3H, CH<sub>3</sub>), 2.38–2.26 (m, 1H, 1H<sub>7</sub>). <sup>13</sup>C NMR (CDCl<sub>3</sub>): δ 191.7 (C<sub>4</sub>), 158.7 (C<sub>7a</sub>), 147.3 (C<sub>4</sub> OTs + C<sub>4</sub> NTs), 145.7 (C<sub>3</sub>), 133.3 (C<sub>1</sub> OTs), 132.9 (C<sub>1</sub> NTs), 131.5 (C<sub>3</sub> + C<sub>5</sub> OTs), 130.7 (C<sub>3</sub> + C<sub>5</sub> NTs), 129.0 (C<sub>2</sub> + C<sub>6</sub> OTs), 128.3 (C<sub>2</sub> + C<sub>6</sub> NTs), 120.52 (C<sub>3a</sub>), 72.1 (CH<sub>2</sub>OTs), 41.7 (C<sub>5</sub>), 35.5 (C<sub>6</sub>), 26.2 (C<sub>7</sub>), 22.23 (2CH<sub>3</sub>). MS (EI) *m/z*: 289 [M – (CH<sub>2</sub>OTs)]<sup>+</sup>. Anal. (C<sub>22</sub>H<sub>22</sub>N<sub>2</sub>O<sub>6</sub>S<sub>2</sub>·0.2H<sub>2</sub>O): C, H, N, S.

**6,7-Dihydro-1-methyl-6-(tosyloxymethyl)-1*H*-indazol-4(5*H*)-one (10).**

Eluent: 1:1 toluene/acetone. White solid, mp 149–150 °C (2-propanol). Yield: 71%. IR: 3444, 1666, 1519, 1459, 1174. <sup>1</sup>H NMR (CDCl<sub>3</sub>): δ 7.83 (s, 1H, H<sub>3</sub>), 7.79 (d, 2H, *J* = 8.3 Hz, H<sub>2</sub> + H<sub>6</sub> Ts), 7.37 (d, 2H, *J* = 8.0 Hz, H<sub>3</sub> + H<sub>5</sub> Ts), 4.09–3.98 (m, 2H, CH<sub>2</sub>OTs), 3.81 (s, 3H, NCH<sub>3</sub>), 3.02–2.98 (m, 1H, 1H<sub>5</sub>), 2.71–2.66 (m, 2H, 1H<sub>5</sub>, H<sub>6</sub>), 2.46 (s, 3H, CH<sub>3</sub>Ph), 2.41–2.27 (m, 2H, 2H<sub>7</sub>). <sup>13</sup>C NMR (CDCl<sub>3</sub>): δ 190.4 (CO), 147.8 (C<sub>7a</sub>), 145.8 (C<sub>4</sub> Ts), 137.5 (C<sub>3</sub>), 132.8 (C<sub>1</sub> Ts), 130.5 (C<sub>3</sub> + C<sub>5</sub> Ts), 128.3 (C<sub>2</sub> +



C<sub>6</sub> Ts), 119.3 (C<sub>3a</sub>), 72.2 (CH<sub>2</sub>OTs), 40.4 (C<sub>5</sub>), 36.6 (NCH<sub>3</sub>), 36.0 (C<sub>6</sub>), 24.3 (C<sub>7</sub>), 22.1 (CH<sub>3</sub>Ph). MS (CI) *m/z*: 335 [M + H]<sup>+</sup>. Anal. (C<sub>16</sub>H<sub>18</sub>N<sub>2</sub>O<sub>4</sub>S): C, H, N, S.

**6,7-Dihydro-3-methyl-6-(tosyloxymethyl)benzo[d]isoxazol-4(5H)-one (16).**

Eluent: 1:2 AcOEt/hexane. White solid, mp 109–110 °C (2-propanol). Yield: 61%. IR: 1687, 1601, 1417, 1173. <sup>1</sup>H NMR (CDCl<sub>3</sub>): δ 7.79 (d, 2H, *J* = 8.3 Hz, H<sub>2</sub> + H<sub>6</sub> Ts), 7.38 (d, 2H, *J* = 8.1 Hz, H<sub>3</sub> + H<sub>5</sub> Ts), 4.14–4.01 (m, 2H, CH<sub>2</sub>OTs), 3.12 (dd, 1H, *J* = 16.7, 4.2 Hz, 1H<sub>7</sub>), 2.81 (dd, 1H, *J* = 17.2, 10.1 Hz, 1H<sub>7</sub>), 2.75–2.68 (m, 1H, H<sub>6</sub>), 2.56–2.46 (m, 1H, 1H<sub>5</sub>), 2.47 (s, 3H, CH<sub>3</sub>), 2.44 (s, 3H, CH<sub>3</sub>Ph), 2.43–2.32 (m, 1H, 1H<sub>5</sub>). <sup>13</sup>C NMR (CDCl<sub>3</sub>): δ 190.4 (CO), 179.1 (C<sub>7a</sub>), 157.3 (C<sub>3</sub>), 145.4 (C<sub>4</sub> Ts), 132.3 (C<sub>1</sub> Ts), 130.5 (C<sub>3</sub> + C<sub>5</sub> Ts), 128.3 (C<sub>2</sub> + C<sub>6</sub> Ts), 115.0 (C<sub>3a</sub>), 71.5 (CH<sub>2</sub>OTs), 40.8 (C<sub>5</sub>), 35.5 (C<sub>6</sub>), 26.1 (C<sub>7</sub>), 22.1 (CH<sub>3</sub>Ph), 11.1 (CH<sub>3</sub>). MS (EI) *m/z*: 335 [M]<sup>+</sup>. Anal. (C<sub>16</sub>H<sub>17</sub>NO<sub>5</sub>S): C, H, N, S.

**6,7-Dihydro-2-methyl-6-(tosyloxymethyl)benzoxazol-4(5H)-one (21).**

Eluent: AcOEt. White solid, mp 123–125 °C. Yield: 66%. IR: 2955, 1692, 1596, 1359, 1177, 1048. <sup>1</sup>H NMR (CDCl<sub>3</sub>): δ 7.78 (d, 2H, *J* = 8.3 Hz, H<sub>2</sub> + H<sub>6</sub> OTs), 7.37 (d, 2H, *J* = 8.1 Hz, H<sub>3</sub> + H<sub>5</sub> OTs), 4.15–3.99 (m, 2H, CH<sub>2</sub>OTs), 3.06 (dd, 1H, *J* = 16.9, 4.8 Hz, 1H<sub>7</sub>), 2.88–2.54 (m, 2H, 1H<sub>7</sub> + H<sub>6</sub>), 2.48 (s, 3H, CH<sub>3</sub>), 2.46 (s, 3H, CH<sub>3</sub>Ph), 2.43–2.22 (m, 2H, 2H<sub>5</sub>). <sup>13</sup>C NMR (CDCl<sub>3</sub>): δ 188.9 (C<sub>4</sub>), 166.7 (C<sub>2</sub>), 161.8 (C<sub>7a</sub>), 145.8 (C<sub>4</sub> Ts), 133.7 (C<sub>1</sub> Ts), 132.8 (C<sub>3a</sub>), 130.5 (C<sub>3</sub> + C<sub>5</sub> Ts), 128.3 (C<sub>2</sub> + C<sub>6</sub> Ts), 71.8 (CH<sub>2</sub>OTs), 40.4 (C<sub>5</sub>), 35.4 (C<sub>6</sub>), 25.3 (C<sub>7</sub>), 22.1 (CH<sub>3</sub>Ph), 14.3 (CH<sub>3</sub>). MS (EI) *m/z*: 335 [M]<sup>+</sup>. Anal. (C<sub>16</sub>H<sub>17</sub>NO<sub>5</sub>S·0.15H<sub>2</sub>O): C, H, N, S.

**5,6-Dihydro-2-(pyrrolidin-1-yl)-5-(tosyloxymethyl)benzothiazole-7(4H)-one (26).**

Eluent: AcOEt. Yellow solid, mp 154–155 °C (2-propanol). Yield: 57%. IR: 1627, 1573, 1517, 1400, 1362, 1176, 1121. <sup>1</sup>H NMR (CDCl<sub>3</sub>): δ 7.79 (d, 2H, *J* = 8.2 Hz, H<sub>2</sub> + H<sub>6</sub> Ph), 7.35 (d, 2H, *J* = 8.1 Hz, H<sub>3</sub> + H<sub>5</sub> Ph), 4.03 (d, 2H, *J* = 5.2 Hz, TsOCH<sub>2</sub>), 3.52 (sa, 4H, 2H<sub>2</sub> + 2H<sub>5</sub> Pyr), 3.02–2.92 (m, 1H, 1H<sub>4</sub>), 2.78–2.47 (m, 4H, 1H<sub>4</sub> + 1H<sub>5</sub> + 2H<sub>6</sub>), 2.45 (s, 3H, CH<sub>3</sub>), 2.10–2.04 (m, 4H, 2H<sub>3</sub> + 2H<sub>4</sub> Pyr). <sup>13</sup>C NMR (CDCl<sub>3</sub>): δ 187.7 (CO), 171.4 (C<sub>2</sub>), 166.4 (C<sub>3a</sub>), 145.0 (C<sub>4</sub> Ts), 132.6 (C<sub>1</sub> Ts), 129.9 (C<sub>3</sub> + C<sub>5</sub> Ts), 127.8 (C<sub>2</sub>+C<sub>6</sub> Ts), 119.2 (C<sub>7a</sub>), 72.1 (CH<sub>2</sub>OTs), 49.9 (C<sub>6</sub>), 39.3 (C<sub>2</sub> + C<sub>5</sub> Pyr), 35.1 (C<sub>5</sub>), 30.0 (C<sub>4</sub>), 25.5 (C<sub>3</sub> + C<sub>4</sub> Pyr), 21.6 (CH<sub>3</sub>). MS (EI) *m/z*: 406 [M]<sup>+</sup>. Anal. Calcd (C<sub>19</sub>H<sub>22</sub>N<sub>2</sub>O<sub>4</sub>S<sub>2</sub>·0.25H<sub>2</sub>O): C, H, N, S.

**General procedure for the preparation of the 4-(4-fluorobenzoyl)piperidine derivatives 11a, 12a, 17a, 22a, and 27a.**



A mixture of the corresponding tosylate **9**, **10**, **16**, **21**, or **26** (0.42 mmol) and 4-(4-fluorobenzoyl)piperidine (170 mg, 0.84 mmol) in anhydrous solvent (3 mL) was stirred under reflux for 24–96 h. After cooling to room temperature, the precipitate was removed by filtration, the solvent was concentrated under reduced pressure, and the residue was purified by column chromatography.

**6,7-Dihydro-6-[(4-(4-fluorobenzoyl)piperidin-1-yl)methyl]-1H-indazole-4(5H)-one (11a).**

Reaction conditions: refluxing in benzene for 24 h. Eluent: 1:4 AcOEt/hexane. Colourless oil. Yield: 24%. IR: 3280, 2929, 1667, 1598. <sup>1</sup>H NMR (CDCl<sub>3</sub>): δ 7.98 (s, 1H, H<sub>3</sub>), 7.97 (dd, 2H, *J* = 8.9, 5.4 Hz, H<sub>2</sub> + H<sub>6</sub> Bz), 7.14 (t, 2H, *J* = 17.2, 8.6 Hz, H<sub>3</sub> + H<sub>5</sub> Bz), 3.20–3.11 (m, 2H, CH<sub>2</sub>–Pip), 2.99–2.85 (m, 2H, 2H<sub>5</sub>), 2.68–2.54 (m, 3H, 2H<sub>4</sub> Pip + H<sub>6</sub> + 1H<sub>7</sub>), 2.46–2.04 (m, 5H, 1H<sub>7</sub> + 2H<sub>2</sub> Pip + 2H<sub>6</sub> Pip), 1.87–1.78 (m, 4H, 2H<sub>3</sub> + 2H<sub>5</sub> Pip). <sup>13</sup>C NMR (CDCl<sub>3</sub>): δ 201.6 (CO Bz), 193.9 (CO Idz), 166.1 (d, *J* = 254 Hz, C<sub>4</sub> Ph), 149.3 (C<sub>7a</sub>), 134.8 (C<sub>3</sub>), 132.7 (C<sub>1</sub> Ph), 131.2 (d, *J* = 9.1 Hz, C<sub>2</sub> + C<sub>6</sub> Ph), 119.5 (C<sub>3a</sub>), 116.1 (d, *J* = 21.9 Hz, C<sub>3</sub> + C<sub>5</sub> Ph), 63.3 (CH<sub>2</sub>–Pip), 54.6, 53.4 (C<sub>2</sub> + C<sub>6</sub> Pip), 43.9 (C<sub>4</sub> Pip), 43.7 (C<sub>5</sub>), 34.5 (C<sub>6</sub>), 29.2, 29.0 (C<sub>3</sub> + C<sub>5</sub> Pip), 26.7 (C<sub>7</sub>). MS (EI) *m/z*: 355 [M]<sup>+</sup>. Hydrochloride: mp 220–223 °C. Anal. Calcd (C<sub>20</sub>H<sub>22</sub>FN<sub>3</sub>O<sub>2</sub>·2HCl·0.5H<sub>2</sub>O): C, H, N.

**6,7-Dihydro-1-methyl-6-[(4-(4-fluorobenzoyl)piperidin-1-yl)methyl]-1H-indazole-4(5H)-one (12a).**

Reaction conditions: refluxing in acetonitrile for 96 h. Eluent: 1:1 toluene/acetone. White solid, mp 169–170 °C (AcOEt). Yield: 27%. IR: 1666, 1596, 1512, 1213. <sup>1</sup>H NMR (CDCl<sub>3</sub>): δ 7.97 (dd, 2H, *J* = 8.8, 5.4 Hz, H<sub>2</sub> + H<sub>6</sub> Ph), 7.84 (s, 1H, H<sub>3</sub>), 7.14 (t, 2H, *J* = 17.1, 8.6 Hz, H<sub>3</sub> + H<sub>5</sub> Ph), 3.83 (s, 3H, NCH<sub>3</sub>), 3.22–3.10 (m, 2H, CH<sub>2</sub>–Pip), 3.06–2.97 (m, 2H, 2H<sub>5</sub>), 2.89–2.86 (m, 1H, H<sub>4</sub> Pip), 2.63–2.35 (m, 4H, H<sub>6</sub> + 2H<sub>7</sub> + 1H<sub>2</sub> Pip), 2.28–2.04 (m, 1H, 1H<sub>2</sub> Pip), 1.89–1.80 (m, 2H, 2H<sub>3</sub> Pip). <sup>13</sup>C NMR (CDCl<sub>3</sub>): δ 201.5 (CO Bz), 192.6 (CO Idz), 165.6 (d, *J* = 254.8 Hz, C<sub>4</sub> Ph), 149.3 (C<sub>7a</sub>), 137.4 (C<sub>3</sub>), 132.8 (C<sub>1</sub> Ph), 131.2 (d, *J* = 9.1 Hz, C<sub>2</sub> + C<sub>6</sub> Ph), 119.7 (C<sub>3a</sub>), 116.2 (d, *J* = 21.9 Hz, C<sub>3</sub> + C<sub>5</sub> Ph), 63.3 (CH<sub>2</sub>–Pip), 55.0, 53.1 (C<sub>2</sub> and C<sub>6</sub> Pip), 44.0 (C<sub>4</sub> Pip), 43.1 (C<sub>5</sub>), 36.6 (NCH<sub>3</sub>), 34.3 (C<sub>6</sub>), 29.3, 29.1 (C<sub>3</sub> and C<sub>5</sub> Pip), 26.1 (C<sub>7</sub>). MS (CI) *m/z*: 370 [M + H]<sup>+</sup>. Anal. Calcd (C<sub>21</sub>H<sub>24</sub>FN<sub>3</sub>O<sub>2</sub>·0.08CHCl<sub>3</sub>): C, H, N.

**6,7-Dihydro-6-[(4-(4-fluorobenzoyl)piperidin-1-yl)methyl]-3-methylbenzo[d]isoxazole-4(5H)-one (17a).**

Reaction conditions: refluxing in acetonitrile for 31 h. Eluent: 1:1 AcOEt/hexane. White solid, mp 129–130 °C (2-propanol). Yield: 50%. IR: 2954, 1682, 1597. <sup>1</sup>H NMR (CDCl<sub>3</sub>): δ 7.96 (dd, 2H, *J* = 8.8, 5.5 Hz, H<sub>2</sub> + H<sub>6</sub> Ph), 7.14 (t, 2H, *J* = 17.1, 8.5 Hz, H<sub>3</sub> + H<sub>5</sub> Ph), 3.25–3.15 (m, 2H, CH<sub>2</sub>–Pip),

2.96–2.85 (m, 2H, 2H<sub>7</sub>), 2.76–2.61 (m, 3H, H<sub>4</sub> Pip + H<sub>6</sub> + 1H<sub>5</sub>), 2.46 (s, 3H, CH<sub>3</sub>), 2.40 (d, 1H, *J* = 6.6 Hz, 1H<sub>5</sub>), 2.33–2.06 (m, 4H, 2H<sub>2</sub> + 2H<sub>6</sub> Pip), 1.85–1.83 (m, 4H, 2H<sub>3</sub> + 2H<sub>5</sub> Pip). <sup>13</sup>C NMR (CDCl<sub>3</sub>): δ 201.3 (CO Bz), 193.0 (CO Bzi), 181.1 (C<sub>7a</sub>), 166.0 (d, *J* = 254.5 Hz, C<sub>4</sub> Ph), 157.7 (C<sub>3</sub>), 132.8 (C<sub>1</sub> Ph), 131.2 (d, *J* = 7.5 Hz, C<sub>2</sub> + C<sub>6</sub> Ph), 116.1 (d, *J* = 22.6 Hz, C<sub>3</sub> + C<sub>5</sub> Ph), 115.5 (C<sub>3a</sub>), 62.9 (CH<sub>2</sub>–Pip), 54.6, 53.5 (C<sub>2</sub> and C<sub>6</sub> Pip), 43.9 (C<sub>4</sub> Pip), 43.3 (C<sub>5</sub>), 33.9 (C<sub>6</sub>), 29.2, 29.1 (C<sub>3</sub> and C<sub>5</sub> Pip), 27.8 (C<sub>7</sub>), 11.2 (CH<sub>3</sub>). MS (CI) *m/z*: 371 [M + H]<sup>+</sup>. Anal. Calcd (C<sub>21</sub>H<sub>23</sub>FN<sub>2</sub>O<sub>3</sub>·0.35H<sub>2</sub>O): C, H, N.

**6,7-Dihydro-2-methyl-6-[(4-(4-fluorobenzoyl)piperidin-1-yl)methyl]benzoxazole-4(5*H*)-one (22a).**

Reaction conditions: refluxing in acetonitrile for 24 h. Eluent: AcOEt. White solid, mp 150–152 °C (2-propanol). Yield: 50%. IR: 2935, 1684, 1594, 1200. <sup>1</sup>H NMR (CDCl<sub>3</sub>): δ 7.95 (dd, 2H, *J* = 8.8, 5.3 Hz, H<sub>2</sub> + H<sub>6</sub> Bz), 7.13 (t, 2H, *J* = 17.1, 8.6 Hz, H<sub>3</sub> + H<sub>5</sub> Bz), 3.19–3.05 (m, 2H, CH<sub>2</sub>–Pip), 2.96–2.84 (m, 2H, 2H<sub>7</sub>), 2.73–2.62 (m, 3H, H<sub>4</sub> Pip + H<sub>6</sub> + 1H<sub>5</sub>), 2.47 (s, 3H, CH<sub>3</sub>), 2.46–2.32 (m, 1H, 1H<sub>5</sub>), 2.30–2.02 (m, 4H, 2H<sub>2</sub> + 2H<sub>6</sub> Pip), 1.86–1.77 (m, 4H, 2H<sub>3</sub> + 2H<sub>5</sub> Pip). <sup>13</sup>C NMR (CDCl<sub>3</sub>): δ 201.4 (CO Bz), 191.0 (CO Bzi), 167.7 (C<sub>2</sub>), 163.2 (d, *J* = 157.9 Hz, C<sub>4</sub> Bz), 164.2 (C<sub>7a</sub>), 134.6 (C<sub>1</sub> Bz), 132.8 (C<sub>3a</sub>), 131.2 (d, *J* = 9.1 Hz, C<sub>2</sub> and C<sub>6</sub> Bz), 116.1 (d, *J* = 21.9 Hz, C<sub>3</sub> and C<sub>5</sub> Bz), 63.0 (CH<sub>2</sub>–Pip), 54.7, 53.2 (C<sub>2</sub> and C<sub>6</sub> Pip), 43.9 (C<sub>4</sub> Pip), 42.9 (C<sub>5</sub>), 33.7 (C<sub>6</sub>), 29.2, 29.0 (C<sub>3</sub> and C<sub>5</sub> Pip), 26.9 (C<sub>7</sub>), 14.2 (–CH<sub>3</sub>). MS (CI) *m/z*: 371 [M + H]<sup>+</sup>. Anal. Calcd (C<sub>21</sub>H<sub>23</sub>FN<sub>2</sub>O<sub>3</sub>·0.2H<sub>2</sub>O): C, H, N.

**5,6-Dihydro-5-[(4-(4-fluorobenzoyl)piperidin-1-yl)methyl]-2-(pyrrolidin-1-yl)benzothiazole-7(4*H*)-one (27a).**

Reaction conditions: refluxing in acetonitrile for 24 h. Eluent: AcOEt. Yellow solid, mp 232–234 °C. Yield: 31%. IR: 2938, 1683, 1633, 1556, 1383. <sup>1</sup>H NMR (CDCl<sub>3</sub>): δ 7.98–7.93 (m, 2H, H<sub>2</sub> + H<sub>6</sub> Ph), 7.16–7.10 (m, 2H, H<sub>3</sub> + H<sub>5</sub> Ph), 3.53 (br s, 4H, 2H<sub>2</sub> + 2H<sub>5</sub> Pyr), 3.22–2.84 (m, 4H, H<sub>4</sub> Pip + CH<sub>2</sub>–Pip + 1H<sub>4</sub> + 1H<sub>6</sub>), 2.74–2.17 (m, 11H, 1H<sub>4</sub> + H<sub>5</sub> + 1H<sub>6</sub> + 2H<sub>2</sub> Pip + 2H<sub>3</sub> Pip + 2H<sub>5</sub> Pip + 2H<sub>6</sub> Pip), 2.20–1.95 (m, 4H, 2H<sub>3</sub> + 2H<sub>4</sub> Pyr). <sup>13</sup>C NMR (CDCl<sub>3</sub>): δ 201.0 (CO Bz), 190.0 (CO Bzt), 171.3 (C<sub>2</sub>), 168.0 (C<sub>3a</sub>), 165.5 (d, *J* = 254.9 Hz, C<sub>4</sub> Ph), 132.4 (C<sub>1</sub> Ph), 130.8 (d, *J* = 9.6 Hz, C<sub>2</sub> and C<sub>6</sub> Ph), 119.6 (C<sub>7a</sub>), 115.6 (d, *J* = 21.9 Hz, C<sub>3</sub> and C<sub>5</sub> Ph), 63.2 (CH<sub>2</sub>–Pip), 54.0 and 53.3 (C<sub>2</sub> and C<sub>6</sub> Pip), 49.9 (C<sub>6</sub>), 43.6 (C<sub>4</sub> Pip), 41.9 (C<sub>2</sub> + C<sub>5</sub> Pyr), 35.5 (C<sub>5</sub>), 32.3 (C<sub>4</sub>), 28.8 and 28.7 (C<sub>3</sub> and C<sub>5</sub> Pip), 25.5 (C<sub>3</sub> + C<sub>4</sub> Pyr). MS (CI) *m/z*: 442 [M + H]<sup>+</sup>. Anal. Calcd (C<sub>24</sub>H<sub>28</sub>FN<sub>3</sub>O<sub>2</sub>S·0.45C<sub>4</sub>H<sub>8</sub>O<sub>2</sub>·0.9H<sub>2</sub>O): C, H, N, S.

**General procedure for the preparation of the 4-(6-fluorobenzo[*d*]isoxazol-3-yl)piperidine derivatives 11b, 12b, 17b, 22b, and 27b.**

A mixture of the corresponding tosylate **9**, **10**, **16**, **21**, or **26** (0.50 mmol) and 4-(6-fluorobenzo[*d*]isoxazol-3-yl)piperidine (220 mg, 1.00 mmol) in anhydrous solvent (3 mL) was stirred under reflux for 19–72 h. After cooling to room temperature, the precipitate was removed by filtration, the solvent was concentrated under reduced pressure, and the residue was purified by column chromatography.

**6,7-Dihydro-6-[(4-(6-fluorobenzo[*d*]isoxazol-3-yl)piperidin-1-yl)methyl]-1*H*-indazole-4(5*H*)-one (11b).**

Reaction conditions: refluxing in benzene for 72 h. Eluent: 1:4 AcOEt/hexane. Yellowish oil. Yield: 44%. IR: 3216, 2929, 1665, 1616, 1123. <sup>1</sup>H NMR (CDCl<sub>3</sub>): δ 8.00 (s, 1H, H<sub>3</sub>), 7.68 (dd, 1H, *J* = 8.7, 5.1 Hz, H<sub>4</sub> Bzi), 7.23 (dd, 1H, *J* = 8.5, 2.0 Hz, H<sub>7</sub> Bzi), 7.06 (td, 1H, *J* = 8.8, 2.0 Hz, H<sub>5</sub> Bzi), 3.18–2.94 (m, 5H, 2H<sub>5</sub> + CH<sub>2</sub>–Pip + 2H<sub>4</sub> Pip), 2.73–2.11 (m, 7H, H<sub>6</sub> + 2H<sub>7</sub> + 2H<sub>2</sub> + 2H<sub>6</sub> Pip), 2.09–2.02 (m, 4H, 2H<sub>3</sub> + 2H<sub>5</sub> Pip). <sup>13</sup>C NMR (CDCl<sub>3</sub>): δ 193.5 (CO), 164.4 (d, *J* = 226.4 Hz, C<sub>6</sub> Bzi), 163.3 (C<sub>7a</sub> Bzi), 161.1 (C<sub>3</sub> Bzi), 149.3 (C<sub>7a</sub>), 134.8 (C<sub>3</sub>), 122.9 (d, *J* = 11.3 Hz, C<sub>4</sub> Bzi), 118.8 (C<sub>3a</sub>), 117.2 (C<sub>3a</sub> Bzi), 112.3 (d, *J* = 25.4 Hz, C<sub>5</sub> Bzi), 97.4 (d, *J* = 26.6 Hz, C<sub>7</sub> Bzi), 63.5 (CH<sub>2</sub>–Pip), 54.8, 54.0 (C<sub>2</sub> and C<sub>6</sub> Pip), 43.7 (C<sub>5</sub>), 34.8 (C<sub>4</sub> Pip), 34.6 (C<sub>6</sub>), 31.0, 30.9 (C<sub>3</sub> + C<sub>5</sub> Pip), 26.5 (C<sub>7</sub>). Hydrochloride: mp 204–207 °C. MS (EI) *m/z*: 368 [M]<sup>+</sup>. Anal. Calcd (C<sub>20</sub>H<sub>21</sub>FN<sub>4</sub>O<sub>2</sub>·2HCl·2.9H<sub>2</sub>O): C, H, N.

**6,7-Dihydro-6-[(4-(6-fluorobenzo[*d*]isoxazol-3-yl)piperidin-1-yl)methyl]-1-methyl-1*H*-indazole-4(5*H*)-one (12b).**

Reaction conditions: refluxing in acetonitrile for 19 h. Eluent: 2:1 toluene/acetone. White solid, mp 186–187 °C (2-propanol). Yield: 47%. IR: 2940, 2768, 1662, 1613, 1514, 1120. <sup>1</sup>H NMR (CDCl<sub>3</sub>): δ 7.85 (s, 1H, H<sub>3</sub>), 7.67 (dd, 1H, *J* = 8.7, 5.1 Hz, H<sub>4</sub> Bzi), 7.25–7.22 (m, 1H, H<sub>7</sub> Bzi), 7.06 (dt, 1H, *J* = 8.8, 2.1 Hz, H<sub>5</sub> Bzi), 3.84 (s, 3H, NCH<sub>3</sub>), 3.09–2.93 (m, 5H, 2CH<sub>2</sub>–Pip + 2H<sub>5</sub> + H<sub>4</sub> Pip), 2.65–2.40 (m, 3H, H<sub>6</sub> + 2H<sub>7</sub>), 2.30–2.22 (m, 4H, 2H<sub>2</sub> Pip + 2H<sub>6</sub> Pip), 2.18–2.06 (m, 4H, 2H<sub>3</sub> Pip + 2H<sub>5</sub> Pip). <sup>13</sup>C NMR (CDCl<sub>3</sub>): δ 196.9 (CO), 165.1 (d, *J* = 211.3 Hz, C<sub>6</sub> Bzi), 163.9 (C<sub>7a</sub> Bzi), 161.0 (C<sub>3</sub> Bzi), 149.2 (C<sub>7a</sub>), 137.4 (C<sub>3</sub>), 122.8 (d, *J* = 11.3 Hz, C<sub>4</sub> Bzi), 119.7 (C<sub>3a</sub>), 117.4 (C<sub>3a</sub> Bzi), 112.8 (d, *J* = 25.4 Hz, C<sub>5</sub> Bzi), 97.9 (d, *J* = 26.6 Hz, C<sub>7</sub> Bzi), 63.5 (CH<sub>2</sub>–Pip), 54.8, 53.8 (C<sub>2</sub> and C<sub>6</sub> Pip), 43.1 (C<sub>5</sub>), 36.6 (NCH<sub>3</sub>), 34.3 (C<sub>6</sub>), 31.1, 30.1 (C<sub>3</sub> and C<sub>5</sub> Pip), 26.2 (C<sub>7</sub>). MS (EI) *m/z*: 382 [M]<sup>+</sup>. Anal. Calcd (C<sub>21</sub>H<sub>23</sub>FN<sub>4</sub>O<sub>2</sub>): C, H, N. Hydrochloride: mp 220–221 °C.

**6,7-Dihydro-6-[(4-(6-fluorobenzo[*d*]isoxazol-3-yl)piperidin-1-yl)methyl]-3-methylbenzo[*d*]isoxazole-4(5*H*)-one (17b).**

Reaction conditions: refluxing in acetonitrile for 24 h. Eluent: 1:2→1:1 AcOEt/hexane. White solid, mp 135–137 °C (2-propanol). Yield: 50%. IR: 2933, 1683, 1129. <sup>1</sup>H NMR (CDCl<sub>3</sub>): δ 7.67 (dd, 1H, *J* = 8.7, 5.1 Hz, H<sub>4</sub> Bzi), 7.23 (dd, 1H, *J* = 8.5, 2.1 Hz, H<sub>7</sub> Bzi), 7.05 (td, 1H, *J* = 8.8, 2.1 Hz, H<sub>5</sub> Bzi), 3.20 (dd, 1H, *J* = 17.3, 4.6 Hz, HCH–Pip), 3.08–2.92 (m, 3H, HCH–Pip + 2H<sub>7</sub>), 2.77–2.61 (m, 3H, H<sub>4</sub> Pip + H<sub>6</sub> + 1H<sub>5</sub>), 2.45 (s, 3H, CH<sub>3</sub>), 2.42 (d, 1H, *J* = 0.7 Hz, 1H<sub>5</sub>), 2.34–2.13 (m, 4H, 2H<sub>2</sub> + 2H<sub>6</sub> Pip), 2.09–2.00 (m, 4H, 2H<sub>3</sub> + 2H<sub>5</sub> Pip). <sup>13</sup>C NMR (CDCl<sub>3</sub>): δ 190.0 (CO), 181.1 (C<sub>7a</sub>), 164.5 (d, *J* = 250.6 Hz, C<sub>6</sub> Bzi), 164.3 (d, *J* = 14.3 Hz, C<sub>7a</sub> Bzi), 159.54 (C<sub>3</sub>), 122.9 (d, *J* = 10.6 Hz, C<sub>4</sub> Bzi), 117.6 (C<sub>3a</sub> Bzi), 115.5 (C<sub>3a</sub>), 112.8 (d, *J* = 24.9 Hz, C<sub>5</sub> Bzi), 97.9 (d, *J* = 27.2 Hz, C<sub>7</sub> Bzi), 63.0 (CH<sub>2</sub>–Pip), 54.8, 53.9 (C<sub>2</sub> and C<sub>6</sub> Pip), 43.3 (C<sub>5</sub>), 34.8 (C<sub>4</sub> Pip), 33.9 (C<sub>6</sub>), 31.0, 30.9 (C<sub>3</sub> and C<sub>5</sub> Pip), 27.9 (C<sub>7</sub>), 11.2 (CH<sub>3</sub>). MS (EI) *m/z*: 383 [M]<sup>+</sup>. Hydrochloride: mp 212–215 °C. Anal. Calcd (C<sub>21</sub>H<sub>22</sub>FN<sub>3</sub>O<sub>3</sub>·HCl·0.35H<sub>2</sub>O): C, H, N.

**6,7-Dihydro-2-methyl-6-[(4-(6-fluorobenzo[d]isoxazol-3-yl)piperidin-1-yl)methyl]benzoxazole-4(5*H*)-one (22b).**

Reaction conditions: refluxing in acetonitrile for 24 h. Eluent: AcOEt/hexane. Colourless oil. Yield: 20%. IR: 2924, 1686, 1612, 1458, 1119. <sup>1</sup>H NMR (CDCl<sub>3</sub>): δ 7.68 (dd, 1H, *J* = 8.7, 5.1 Hz, H<sub>4</sub> Bzi), 7.23 (dd, 1H, *J* = 8.6, 2.1 Hz, H<sub>7</sub> Bzi), 7.06 (td, 1H, *J* = 8.8, 2.0 Hz, H<sub>5</sub> Bzi), 3.14–2.92 (m, 4H, CH<sub>2</sub>–Pip + 2H<sub>7</sub>), 2.76–2.68 (m, 3H, H<sub>4</sub> Pip + H<sub>6</sub> + 1H<sub>5</sub>), 2.49 (s, 3H, CH<sub>3</sub>), 2.47–2.12 (m, 5H, 1H<sub>5</sub> + 2H<sub>2</sub> Pip + 2H<sub>6</sub> Pip), 2.09–2.00 (m, 4H, 2H<sub>3</sub> + 2H<sub>5</sub> Pip). <sup>13</sup>C NMR (CDCl<sub>3</sub>): δ 191.0 (CO), 164.0 (d, *J* = 250.6 Hz, C<sub>6</sub> Bzi), 163.9 (C<sub>2</sub>), 163.8 (C<sub>7a</sub> Bzi), 161.8 (C<sub>7a</sub>), 160.9 (C<sub>3</sub> Bzi), 134.7 (C<sub>3a</sub>), 122.9 (d, *J* = 11.3 Hz, C<sub>4</sub> Bzi), 117.7 (C<sub>3a</sub> Bzi), 112.8 (d, *J* = 24.9 Hz, C<sub>5</sub> Bzi), 97.8 (d, *J* = 26.41 Hz, C<sub>7</sub> Bzi), 63.1 (CH<sub>2</sub>–Pip), 54.8, 53.8 (C<sub>2</sub> and C<sub>6</sub> Pip), 42.9 (C<sub>5</sub>), 34.8 (C<sub>4</sub> Pip), 33.7 (C<sub>6</sub>), 31.0, 30.9 (C<sub>3</sub> and C<sub>5</sub> Pip), 27.0 (C<sub>7</sub>), 14.3 (CH<sub>3</sub>). MS (CI) *m/z*: 384 [M + H]<sup>+</sup>. Hydrochloride: mp 226–227 °C (Et<sub>2</sub>O/MeOH). Anal. Calcd (C<sub>21</sub>H<sub>23</sub>ClFN<sub>3</sub>O<sub>3</sub>): C, H, N.

**5,6-Dihydro-5-[(4-(6-fluorobenzo[d]isoxazol-3-yl)piperidin-1-yl)methyl]-2-(pyrrolidin-1-yl)benzothiazole-7(4*H*)-one (27b).**

Reaction conditions: refluxing in acetonitrile for 28 h. Eluent: AcOEt. White solid, mp 75–77 °C (cyclohexane). Yield: 46%. IR: 2926, 1632, 1551, 1385, 1298, 1122. <sup>1</sup>H NMR (CDCl<sub>3</sub>): δ 7.70 (dd, 1H, *J* = 8.7, 5.1 Hz, H<sub>4</sub> Bzi), 7.22 (d, 1H, *J* = 2.1 Hz, H<sub>7</sub> Bzi), 7.06 (td, 1H, *J* = 8.8, *J* = 2.2 Hz, H<sub>5</sub> Bzi), 3.53 (br s, 4H, 2H<sub>2</sub> + 2H<sub>5</sub> Pyr), 3.15–2.96 (m, 4H, H<sub>4</sub> Pip + CH<sub>2</sub>–Pip + 1H<sub>4</sub>), 2.71–2.41 (m, 4H, 1H<sub>4</sub> + H<sub>5</sub> + 2H<sub>6</sub>), 2.33–2.02 (m, 12H, 2H<sub>2</sub> Pip + 2H<sub>3</sub> Pip + 2H<sub>5</sub> Pip + 2H<sub>6</sub> Pip + 2H<sub>3</sub> Pyr + 2H<sub>4</sub> Pyr). <sup>13</sup>C NMR (CDCl<sub>3</sub>): δ 189.9 (CO), 171.3 (C<sub>2</sub>), 167.9 (C<sub>3a</sub>), 165.7 (C<sub>7a</sub> Bzi), 162.5 (d, *J* = 210.4 Hz, C<sub>6</sub> Bzi), 122.6 (d, *J* = 10.3 Hz, C<sub>4</sub> Bzi), 119.6 (C<sub>7a</sub>), 117.2 (C<sub>3a</sub> Bzi), 112.2 (d, *J* = 24.5 Hz, C<sub>5</sub> Bzi),

97.3 (d,  $J = 27.1$  Hz, C<sub>7</sub> Bzi), 63.2 (CH<sub>2</sub>–Pip), 54.1 and 53.6 (C<sub>2</sub> and C<sub>6</sub> Pip), 49.9 (C<sub>6</sub>), 41.9 (C<sub>2</sub> + C<sub>5</sub> Pyr), 34.5 (C<sub>4</sub> Pip), 33.5 (C<sub>5</sub>), 32.3 (C<sub>4</sub>), 30.6 and 29.1 (C<sub>3</sub> and C<sub>5</sub> Pip), 25.5 (C<sub>3</sub> + C<sub>4</sub> Pyr). MS (CI)  $m/z$ : 455 [M + H]<sup>+</sup>. Anal. Calcd (C<sub>24</sub>H<sub>27</sub>FN<sub>4</sub>O<sub>2</sub>S·0.05C<sub>6</sub>H<sub>12</sub>·0.65H<sub>2</sub>O): C, H, N, S.

**General procedure for the preparation of the 4-(6-fluoro-1*H*-indol-3-yl)piperidine derivatives 17c, 22c, and 27c**

A mixture of the corresponding tosylate **16**, **21**, or **26** (0.50 mmol) and 4-(6-fluoro-1*H*-indol-3-yl)piperidine (218 mg, 1.00 mmol) in anhydrous acetonitrile (3 mL) was stirred under reflux for 24 h. After cooling to room temperature, the precipitate was removed by filtration, the solvent was concentrated under reduced pressure, and the residue was purified by column chromatography.

**6,7-Dihydro-6-[(4-(6-fluoro-1*H*-indol-3-yl)piperidin-1-yl)methyl]-3-methylbenzo[*d*]isoxazole-4(5*H*)-one (17c).**

Eluent: ethanol. White solid, mp 176–178 °C. Yield: 48%. IR: 2369, 1683, 1461, 1052. <sup>1</sup>H NMR (CDCl<sub>3</sub>): δ 7.98 (s, 1H, NH), 7.50 (dd, 1H,  $J = 8.6, 5.5$  Hz, H<sub>4</sub> Ind), 7.01 (dd, 1H,  $J = 9.6, 2.1$  Hz, H<sub>5</sub> Ind), 6.92 (d,  $J = 1.9$  Hz, H<sub>7</sub> Ind), 6.85 (td, 1H,  $J = 9.1, 1.9$  Hz, H<sub>2</sub> Ind), 3.18 (dd, 1H,  $J = 17.4, 3.2$ , HCH–Pip), 2.95–2.47 (m, 6H, HCH–Pip + 2H<sub>7</sub> + H<sub>4</sub> Pip + H<sub>6</sub> + 1H<sub>5</sub>), 2.45 (s, 3H, CH<sub>3</sub>), 2.40 (dd, 1H,  $J = 7.0, 2.7$  Hz, 1H<sub>5</sub>), 2.32–2.11 (m, 4H, 2H<sub>2</sub> + 2H<sub>6</sub> Pip), 2.08–1.97 (m, 2H, 1H<sub>3</sub> + 1H<sub>5</sub> Pip), 1.81–1.68 (m, 2H, 1H<sub>3</sub> + 1H<sub>5</sub> Pip). <sup>13</sup>C NMR (CDCl<sub>3</sub>): δ 192.8 (CO), 180.8 (C<sub>7a</sub>), 159.2 (d,  $J = 284.2$  Hz, C<sub>6</sub> Ind), 158.7 (C<sub>3</sub>), 136.3 (C<sub>7a</sub> Ind), 123.2 (C<sub>3a</sub> Ind), 121.5 (C<sub>3</sub> Ind), 119.8 (C<sub>2</sub> Ind), 119.7 (d,  $J = 13.2$  Hz, C<sub>4</sub> Ind), 115.1 (C<sub>3a</sub>), 107.8 (d,  $J = 24.3$  Hz, C<sub>5</sub> Ind), 97.4 (d,  $J = 26.1$  Hz, C<sub>7</sub> Ind), 62.8 (CH<sub>2</sub>–Pip), 55.3, 54.3 (C<sub>2</sub> and C<sub>6</sub> Pip), 43.0 (C<sub>5</sub>), 33.6, 33.5 (C<sub>4</sub> Pip and C<sub>6</sub>), 33.1, 33.0 (C<sub>3</sub> and C<sub>5</sub> Pip), 27.6 (C<sub>7</sub>), 10.8 (CH<sub>3</sub>). MS (CI)  $m/z$ : 382 [M + H]<sup>+</sup>. HRMS (CI) calcd for C<sub>22</sub>H<sub>24</sub>FN<sub>3</sub>O<sub>2</sub> [M + H]<sup>+</sup> 382.193081; found, 382.191574.

**6,7-Dihydro--2-methyl-6-[(4-(6-fluoro-1*H*-indol-3-yl)piperidin-1-yl)methyl]benzoxazole-4(5*H*)-one (22c).**

Eluent: ethanol. White solid, mp 97–99 °C. Yield: 34%. IR: 2925, 2369, 1683, 1461, 1052. <sup>1</sup>H NMR (CDCl<sub>3</sub>): δ 8.15 (s, 1H, NH), 7.52 (dd, 1H,  $J = 9.0, 5.3$  Hz, H<sub>4</sub> Ind), 7.04 (dd, 1H,  $J = 9.5, 2.0$  Hz, H<sub>7</sub> Ind), 6.95 (d, 1H,  $J = 1.5$  Hz, H<sub>2</sub> Ind), 6.86 (t, 1H,  $J = 9.1$  Hz, H<sub>5</sub> Ind), 3.04 (dd, 1H,  $J = 4.4, 12.0$  Hz, HCH–Pip), 2.90–2.78 (m, 2H, HCH–Pip + 1H<sub>7</sub>), 2.75–2.66 (m, 4H, 1H<sub>7</sub> + H<sub>4</sub> Pip + H<sub>6</sub> + 1H<sub>5</sub>), 2.49 (s, 3H, CH<sub>3</sub>), 2.46–1.99 (m, 5H, 1H<sub>5</sub> + 2H<sub>2</sub> Pip + 2H<sub>6</sub> Pip), 1.82–1.73 (m, 4H, 2H<sub>3</sub> Pip + 2H<sub>5</sub> Pip). <sup>13</sup>C NMR (CDCl<sub>3</sub>): δ 190.8 (CO), 163.8 (C<sub>2</sub>), 161.8 (C<sub>7a</sub>), 159.8 (d,  $J = 237.4$  Hz, C<sub>6</sub> Ind), 136.3 (C<sub>7a</sub> Ind), 134.2 (C<sub>3a</sub>), 123.2 (C<sub>3a</sub> Ind), 121.2 (C<sub>3</sub> Ind), 120.0 (C<sub>2</sub> Ind), 119.6 (d,  $J = 10.3$  Hz, C<sub>4</sub> Ind), 107.7 (d,  $J = 24.5$  Hz, C<sub>5</sub> Ind), 97.5 (d,  $J = 26.5$  Hz, C<sub>7</sub> Ind), 62.9 (CH<sub>2</sub>–Pip), 55.2, 54.2 (C<sub>2</sub> and C<sub>6</sub>

Pip), 42.6 (C<sub>5</sub>), 33.4 (C<sub>4</sub> Pip), 33.3 (C<sub>6</sub>), 32.9 (C<sub>3</sub> and C<sub>5</sub> Pip), 26.7 (C<sub>7</sub>), 13.8 (CH<sub>3</sub>). MS (CI) *m/z*: 382 [M + H]<sup>+</sup>. Anal. Calcd (C<sub>22</sub>H<sub>24</sub>FN<sub>3</sub>O<sub>2</sub>·0.7H<sub>2</sub>O): C, H, N.

**5,6-Dihydro-5-[(4-(6-fluoro-1*H*-indol-3-yl)piperidin-1-yl)methyl]-2-(pyrrolidin-1-yl)benzothiazole-7(4*H*)-one (27c).**

Eluent: AcOEt. Cream coloured solid, mp 220–222 °C. Yield: 31%. IR: 3419, 2929, 1627, 1552, 1386. <sup>1</sup>H NMR (CDCl<sub>3</sub>): δ 7.96 (s, 1H, NH), 7.51 (dd, 1H, *J* = 8.6, 5.3 Hz, H<sub>4</sub> Ind), 7.01 (dd, 1H, *J* = 9.7, 2.3 Hz, H<sub>7</sub> Ind), 6.92 (d, 1H, *J* = 2.1 Hz, H<sub>2</sub> Ind), 6.84 (td, 1H, *J* = 9.1, 2.3 Hz, H<sub>5</sub> Ind), 3.51 (sa, 4H, 2H<sub>2</sub> + 2H<sub>5</sub> Pyr), 3.10–2.95 (m, 3H, -HCH-Pip + 1H<sub>4</sub> + H<sub>4</sub> Pip), 2.79–2.41 (m, 5H, 1H<sub>4</sub> + H<sub>5</sub> + 2H<sub>6</sub> + HCH-Pip), 2.34–1.96 (m, 8H, 2H<sub>2</sub> Pip + 2H<sub>3</sub> Pip + 2H<sub>5</sub> Pip + 2H<sub>6</sub>Pip), 1.89–1.69 (m, 4H, 2H<sub>3</sub> + 2H<sub>4</sub> Pyr). <sup>13</sup>C NMR (CDCl<sub>3</sub>): δ 190.2 (CO), 171.4 (C<sub>2</sub>), 168.1 (C<sub>3a</sub>), 158.9 (d, *J* = 237.2 Hz, C<sub>6</sub> Ind), 136.4 (C<sub>7a</sub> Ind), 123.2 (C<sub>3a</sub> Ind), 121.3 (C<sub>3</sub> Ind), 120.0 (C<sub>2</sub> Ind), 119.6 (d, *J* = 13.0 Hz, C<sub>4</sub> Ind), 119.9 (C<sub>7a</sub>), 107.5 (d, *J* = 24.3 Hz, C<sub>5</sub> Ind), 97.4 (d, *J* = 25.6 Hz, C<sub>7</sub> Ind), 63.3 (CH<sub>2</sub>-Pip), 54.9, 54.5 (C<sub>2</sub> and C<sub>6</sub> Pip), 49.9 (C<sub>6</sub>), 42.0 (C<sub>2</sub> + C<sub>5</sub> Pyr), 33.6 (C<sub>5</sub>), 33.5 (C<sub>4</sub> Pip), 33.0 (C<sub>3</sub> and C<sub>5</sub> Pip), 32.4 (C<sub>4</sub>), 25.5 (C<sub>3</sub> + C<sub>4</sub> Pyr). MS (CI) *m/z*: 453 [M + H]<sup>+</sup>. Anal. Calcd (C<sub>25</sub>H<sub>29</sub>FN<sub>4</sub>OS·0.2C<sub>4</sub>H<sub>8</sub>O<sub>2</sub>·0.35H<sub>2</sub>O): C, H, N, S.

**General procedure for the preparation of the 4-(6-fluoro-1*H*-indol-3-yl)-1,2,3,6-tetrahydropyridine derivatives 22d and 27d**

A mixture 4-(6-fluoro-1*H*-indol-3-yl)-1,2,3,6-tetrahydropyridine (216 mg, 1.0 mmol) in anhydrous acetonitrile (3 mL) was stirred under reflux for 24 h. After cooling to room temperature, the precipitate was removed by filtration, the solvent was concentrated under reduced pressure, and the residue was purified by column chromatography with AcOEt as the eluent.

**6,7-Dihydro-2-methyl-6-[(4-(6-fluoro-1*H*-indol-3-yl)-1,2,5,6-tetrahydropyridin-1-yl)methyl]benzoxazole-4(5*H*)-one (22d).**

Cream coloured solid, mp 85–86 °C. Yield: 10%. IR: 3365, 1683, 1458, 1049. <sup>1</sup>H NMR (CDCl<sub>3</sub>): δ 8.54 (s, 1H, NH), 7.77 (dd, 1H, *J* = 8.9, 5.4 Hz, H<sub>4</sub> Ind), 7.15 (d, 1H, *J* = 2.0 Hz, H<sub>2</sub> Ind), 7.05 (dd, 1H, *J* = 9.4, 2.3 Hz, H<sub>7</sub> Ind), 6.88 (td, 1H, *J* = 9.1, 2.3 Hz, H<sub>5</sub> Ind), 6.13 (s, 1H, H<sub>3</sub> Thp), 3.21–3.12 (m, 2H, H<sub>2</sub> Thp), 2.78–2.32 (m, 11H, 2H<sub>5</sub> + 2H<sub>6</sub> Thp, CH<sub>2</sub>-Thp + 2H<sub>7</sub> + H<sub>6</sub> + 2H<sub>5</sub>), 2.49 (s, 3H, CH<sub>3</sub>). <sup>13</sup>C NMR (CDCl<sub>3</sub>): δ 190.8 (CO), 163.9 (C<sub>2</sub>), 161.9 (C<sub>7a</sub>), 159.7 (d, *J* = 238.0 Hz, C<sub>6</sub> Ind), 136.9 (d, *J* = 12.0 Hz, C<sub>7a</sub> Ind), 134.2 (C<sub>3a</sub>), 129.6 (C<sub>3a</sub> Ind), 121.7 (C<sub>3</sub> Ind), 121.5 (d, *J* = 41.4 Hz, C<sub>4</sub> Ind), 121.3 (C<sub>2</sub> Ind), 118.8 (C<sub>3</sub> Thp), 117.6 (C<sub>4</sub> Thp), 108.5 (d, *J* = 24.3 Hz, C<sub>5</sub> Ind), 97.6 (d, *J* = 25.6 Hz, C<sub>7</sub> Ind), 62.5 (CH<sub>2</sub>-Thp), 53.6 (C<sub>2</sub> Thp), 50.6 (C<sub>6</sub> Thp), 42.5 (C<sub>5</sub>), 33.4 (C<sub>6</sub>), 28.9 (C<sub>5</sub> Thp), 26.6



(C<sub>7</sub>), 13.8 (CH<sub>3</sub>). MS (CI) *m/z*: 380 [M + H]<sup>+</sup>. HRMS (CI) calcd for C<sub>22</sub>H<sub>22</sub>FN<sub>3</sub>O<sub>2</sub> [M + H]<sup>+</sup> 380.178028; found, 380.177430.

**5,6-Dihydro-5-[(4-(6-fluoro-1*H*-indol-3-yl)-1,2,5,6-tetrahydropyridin-1-yl)methyl]-2-(pyrrolidin-1-yl)benzothiazole-7(4*H*)-one (27d).**

Yellow solid, mp 120–121 °C. Yield: 38%. IR: 2923, 1631, 1553, 1386, 1337. <sup>1</sup>H NMR (CDCl<sub>3</sub>): δ 8.15 (s, 1H, NH), 7.78 (dd, 1H, *J* = 8.7, 5.1 Hz, H<sub>4</sub> Ind), 7.13 (s, 1H, H<sub>2</sub> Ind), 7.05 (d, 1H, *J* = 9.3 Hz, H<sub>7</sub> Ind), 6.88 (t, 1H, *J* = 17.1, 9.3 Hz, H<sub>5</sub> Ind), 6.13 (s, 1H, H<sub>3</sub> Thp), 3.53 (br s, 4H, 2H<sub>2</sub> + 2H<sub>5</sub> Pyr), 3.21–3.08 (m, 3H, 2H<sub>2</sub> Thp + 1H<sub>4</sub>), 2.73–2.28 (m, 10H, 1H<sub>4</sub> + H<sub>5</sub> + 2H<sub>6</sub>, -CH<sub>2</sub>-Thp, 2H<sub>5</sub> + 2H<sub>6</sub> Thp), 2.20–2.10 (m, 4H, 2H<sub>3</sub> Pyr + 2H<sub>4</sub> Pyr). <sup>13</sup>C NMR (CDCl<sub>3</sub>): δ 190.2 (CO), 171.5 (C<sub>2</sub>), 168.2 (C<sub>3a</sub>), 159.6 (d, *J* = 237.4 Hz, C<sub>6</sub> Ind), 137.0 (d, *J* = 12.3, C<sub>7a</sub> Ind), 129.6 (C<sub>3a</sub> Ind), 121.6 (*J* = 38.7 Hz, C<sub>4</sub> Ind), 121.8 (C<sub>3</sub> Ind), 121.2 (C<sub>2</sub> Ind), 119.5 (C<sub>7a</sub>), 118.8 (C<sub>3</sub> Thp), 117.6 (C<sub>4</sub> Thp), 108.3 (d, *J* = 23.9 Hz, C<sub>5</sub> Ind), 97.7 (d, *J* = 25.1 Hz, C<sub>7</sub> Ind), 62.8 (CH<sub>2</sub>-Thp), 53.6 (C<sub>2</sub> Thp), 50.5 (C<sub>6</sub> Thp), 49.9 (C<sub>6</sub>), 41.9 (C<sub>2</sub> + C<sub>5</sub> Pyr), 33.6 (C<sub>5</sub>), 32.3 (C<sub>4</sub>), 28.9 (C<sub>5</sub> Thp), 25.5 (C<sub>3</sub> + C<sub>4</sub> Pyr). MS (CI) *m/z*: 451 [M + H]<sup>+</sup>. Anal. Calcd (C<sub>25</sub>H<sub>27</sub>FN<sub>4</sub>OS·0.7C<sub>4</sub>H<sub>8</sub>O<sub>2</sub>·0.75H<sub>2</sub>O): C, H, N, S.

### 3. Receptor binding studies

The affinity of the new compounds for cloned human D<sub>1</sub>, D<sub>2</sub>, D<sub>3</sub>, 5-HT<sub>2A</sub> and 5-HT<sub>2C</sub> receptors was evaluated by *in vitro* radioligand binding assays according to our previously described procedures.<sup>2,3</sup>

The affinity for cloned human 5-HT<sub>1A</sub> receptors was evaluated by incubating 10 µg of membranes obtained from a HEK293 h5HT<sub>1A</sub> cell line in assay buffer (50 mM Tris-HCl, 5 mM MgCl<sub>2</sub>, pH=7.4) with 2 nM [<sup>3</sup>H]8-OH-DPAT for 120 min at 37 °C in a multiscreen GF/C plate (Millipore). Non-specific binding was defined with 10 µM 5-HT. After incubation time sample was filtered by using a multiscreen manifold (Millipore) and washed 4 times with ice-cold wash buffer (50 mM Tris-HCl, pH=7.4) and then scintillation cocktail (Universol, ICN Biomedicals) was added to each well and radioactivity was detected in a micoplate liquid scintillation detector (Microbeta Trilux, Perkin Elmer).

The affinity for cloned human 5-HT<sub>6</sub> receptors was evaluated by incubating 5 µg of membranes obtained from a HEK h5HT<sub>6</sub> cell line in assay buffer (50 mM Tris-HCl, 10 mM MgCl<sub>2</sub>, 0.5 mM EDTA, pH=7.4) with 3 nM [<sup>3</sup>H]LSD for 60 min at 37 °C in a multiscreen GF/C plate (Millipore). Non-specific binding was defined with 100 µM 5-HT. After incubation time sample was filtered by using a multiscreen manifold (Millipore) and washed 4 times with ice-cold wash buffer (50 mM Tris-HCl, pH=7.4) and then scintillation cocktail (Universol, ICN Biomedicals) was added to each



well and radioactivity was detected in a microplate liquid scintillation detector (Microbeta Trilux, Perkin Elmer).

$K_i$  values (expressed as  $pK_i$ ) were calculated according to the Cheng–Prusoff equation.<sup>4</sup>

#### 4. References

- 1 A. I. Vogel, A. R. Tatchell, B. S. Furnis, A. J. Hannaford, P. W. G. Smith, *Vogel's Textbook of Practical Organic Chemistry*, 5th Edition; Prentice Hall, 1996.
- 2 J. Brea, J. Rodrigo, A. Carrieri, F. Sanz, M. I. Cadavid, M. J. Enguix, M. Villazón, G. Mengod, Y. Caro, C. F. Masaguer, E. Raviña, N. B. Centeno, A. Carotti and M. I. Loza, *J. Med. Chem.*, 2002, **45**, 54–71.
- 3 J. Brea, M. Castro, M. I. Loza, C. F. Masaguer, E. Raviña, C. Dezi, M. Pastor, F. Sanz, A. Cabrero-Castel, B. Galán-Rodríguez, E. Fernández-Espejo, R. Maldonado and P. Robledo, *Neuropharmacology*, 2006, **51**, 251–262.
- 4 Y.-C. Cheng and W. H. Prusoff, *Biochem. Pharmacol.*, 1973, **22**, 3099–3108.
